# Supplementary material for: Strain hysteresis and Mullins effect of rubber vulcanizates with a reversible sacrificial network
Source: Royal Society of Chemistry journal article supplement (doi:10.1039/d4sm01064g), 2024-12-10
Supplement: d4sm01064g1.pdf [file d4sm01064g1.pdf]

## Supplementary Information for

# Strain hysteresis and Mullins effect of rubber vulcanizates with reversible sacrificial network

Rongyan Hu, Xin Jiang, Yaxin Chen, Jinlong Wang, Yuhao Guo, Qiang Zheng\*, Yonggang Shangguan\*

*MOE Key Laboratory of Macromolecule Synthesis and Functionalization, Department of Polymer Science and Engineering, Zhejiang University, Hangzhou 310027, P. R. China*

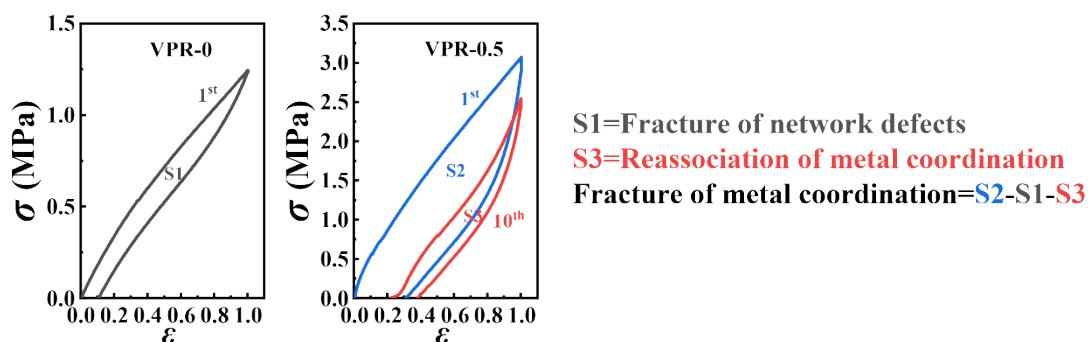

Scheme S1. Schematic diagram of area division.

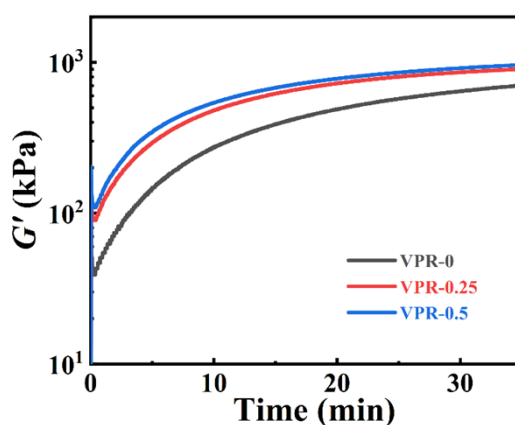

Fig. S1. Vulcanization curves of VPR-x at 150 °C.

\*Corresponding authors. Department of Polymer Science and Engineering, Zhejiang University, Hangzhou 310027, PR China. Tel/fax: +86 0571 8795 3075.

E-mail addresses: [shangguan@zju.edu.cn](mailto:shangguan@zju.edu.cn) (YG. Shangguan).

Due to the absence of effective observation techniques for the sacrificial bond region, its existence can only be inferred through the distribution of  $\text{ZnCl}_2$ . The following figure presents the TEM images of VPR-0.25, VPR-0.5, and VPR-0.67. Individual ions are not easily distinguishable. The dark regions in the TEM images represent aggregates of nanoparticles of different dimensions, suggesting the formation of sacrificial bond regions with varying sizes.

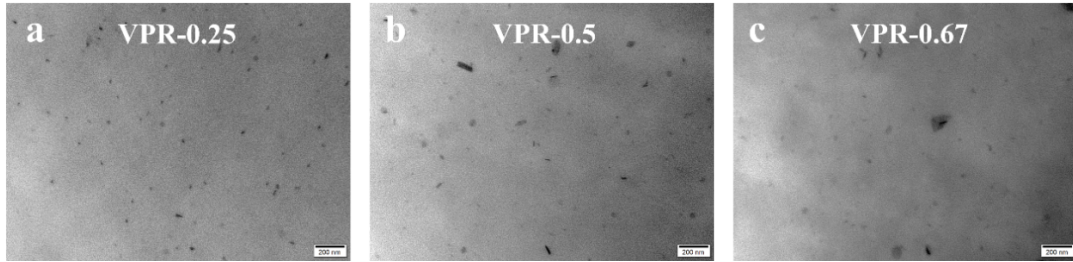

**Fig. S2.** TEM of (a) VPR-0 (b) VPR-0.5, and (b) VPR-0.67.

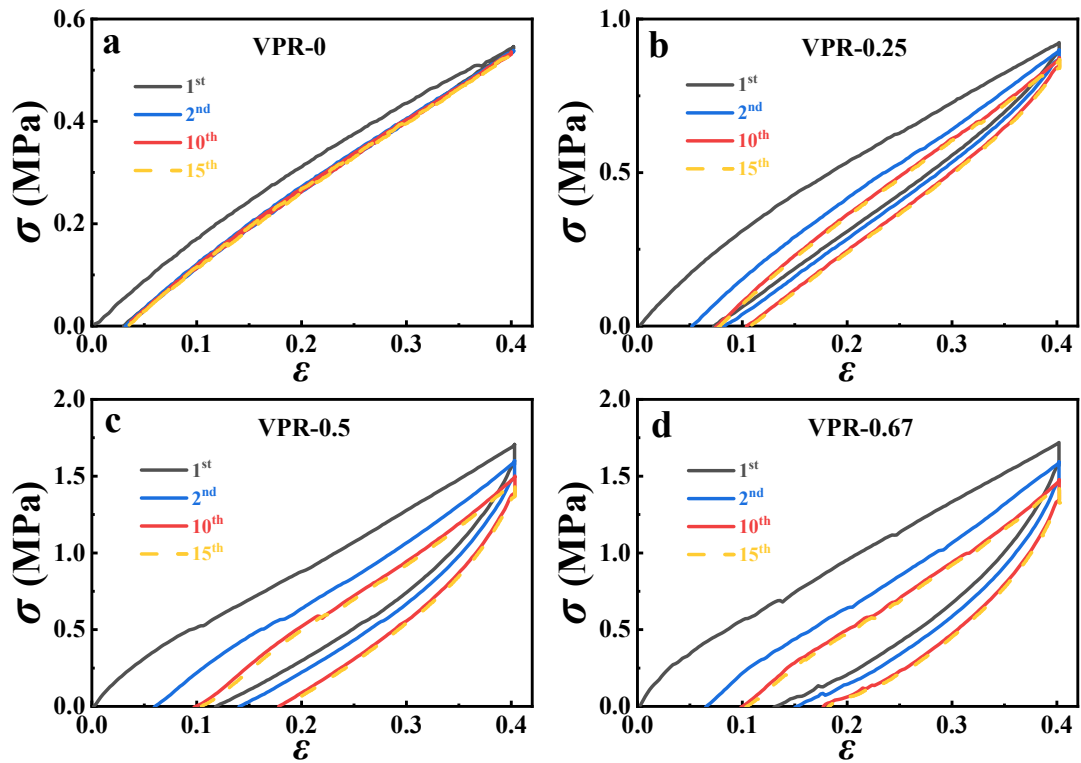

**Fig. S3.** Stress-strain curves of multiple cycles for (a)VPR-0, (b)VPR-0.25, (c) VPR-0.5 and (d) VPR-0.67 at  $\epsilon=0.4$ .

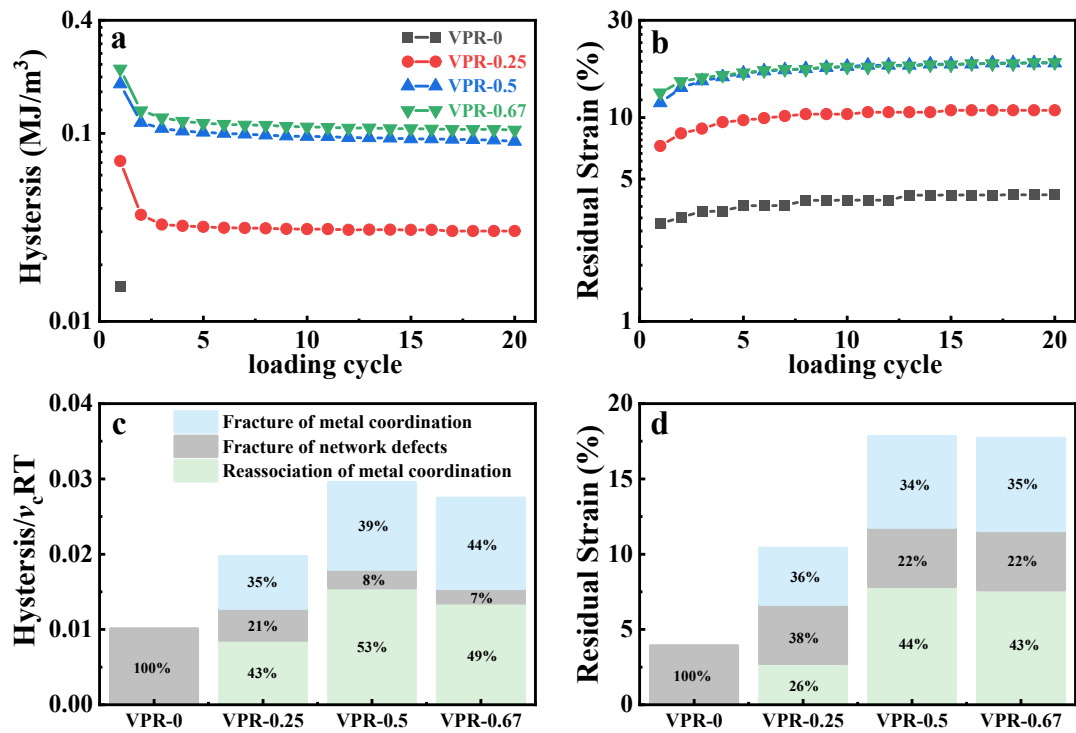

Fig. S4. (a) Area of hysteresis and (b) residual strain of multiple cycles for VPR- $x$  at  $\epsilon=0.4$ .

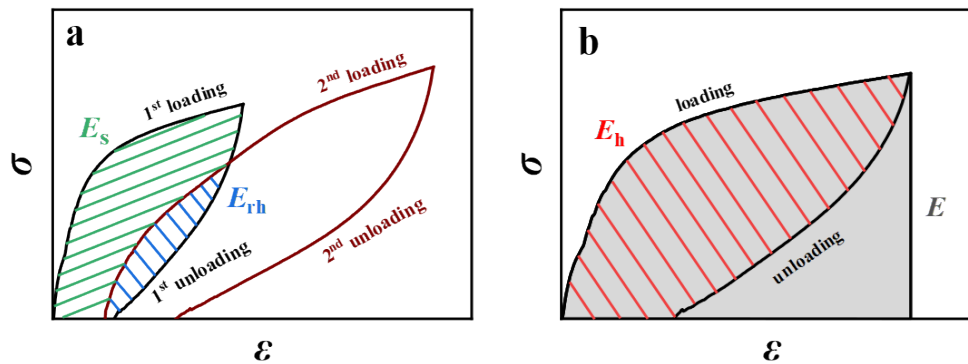

Fig. S5. Definition of energy losses.

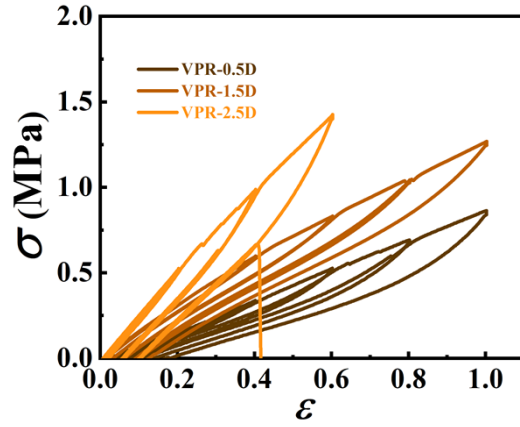

**Fig. S6.** Stress-strain curves of VPR-0 with covalent crosslinking density during sequential loading-unloading tensile tests at a series of different maximum applied strains.

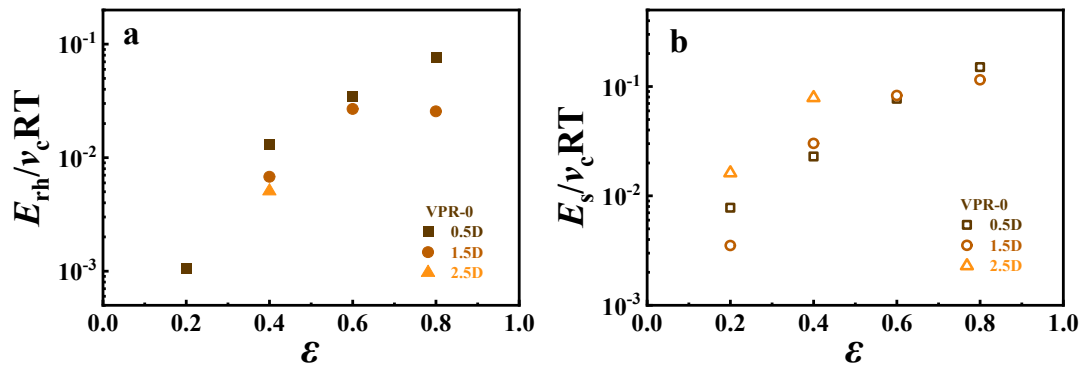

**Fig. S7.** Energy losses of recovery hysteresis ( $E_{rh}$ , a) and softening ( $E_s$ , b) as a function of prestrain.
